# Supplementary material for: A Simple High Efficiency Intra-Islet Transduction Protocol Using Lentiviral Vectors
Source: PubMed Central journal article supplement — Curr Gene Ther. 2015 Aug;15(4):436–46. doi: 10.2174/1566523215666150630121557 (PMC5411998; doi:10.2174/1566523215666150630121557), 2015-08
Supplement: CGT-15-436_SD1.pdf [file CGT-15-436_SD1.pdf]

## Supplementary Materials

# A Simple High Efficiency Intra-Islet Transduction Protocol Using Lentiviral Vectors

Carmen María Jiménez-Moreno<sup>1</sup>, Irene de Gracia Herrera-Gomez<sup>1</sup>, Livia López-Noriega<sup>1</sup>, Petra Isabel Lorenzo<sup>1</sup>, Nadia Cobo-Vuilleumier<sup>1</sup>, Esther Fuente-Martín<sup>1</sup>, José Manuel Mellado-Gil<sup>1</sup>, Géraldine Parnaud<sup>2</sup>, Domenico Bosco<sup>2</sup>, Benoit Raymond Gauthier<sup>1</sup> and Alejandro Martín-Montalvo<sup>1</sup>

<sup>1</sup>Pancreatic Islet Development and Regeneration Unit, Department of Stem Cells, CABIMER-Andalusian Center for Molecular Biology and Regenerative Medicine, Avenida Américo Vespucio, Parque Científico y Tecnológico Cartuja 93, 41092 Sevilla, Spain; <sup>2</sup>Cell Isolation and Transplantation Center, Department of Surgery, Geneva University Hospitals and University of Geneva Rue Michel-Servet 1, 1211 Geneva, Switzerland

**Table S1. Characteristics of human islet preparation used in this study.**

| Donor     | Islet Viability | Islet Purity | Islet Size | Average Islet Size |
|-----------|-----------------|--------------|------------|--------------------|
| Number #1 | 80 %            | 80 %         | 50-400 µm  | 100-200 µm         |
| Number #2 | 80 %            | 80 %         | 50-400 µm  | 100-200 µm         |
| Number #3 | 88 %            | 88 %         | 50-400 µm  | 100-200 µm         |
| Number #4 | 90 %            | 70 %         | 50-400 µm  | 100-200 µm         |
| Number #5 | 95 %            | 90 %         | 50-400 µm  | 100-200 µm         |
| Number #6 | 95 %            | 90 %         | 50-400 µm  | 100-200 µm         |

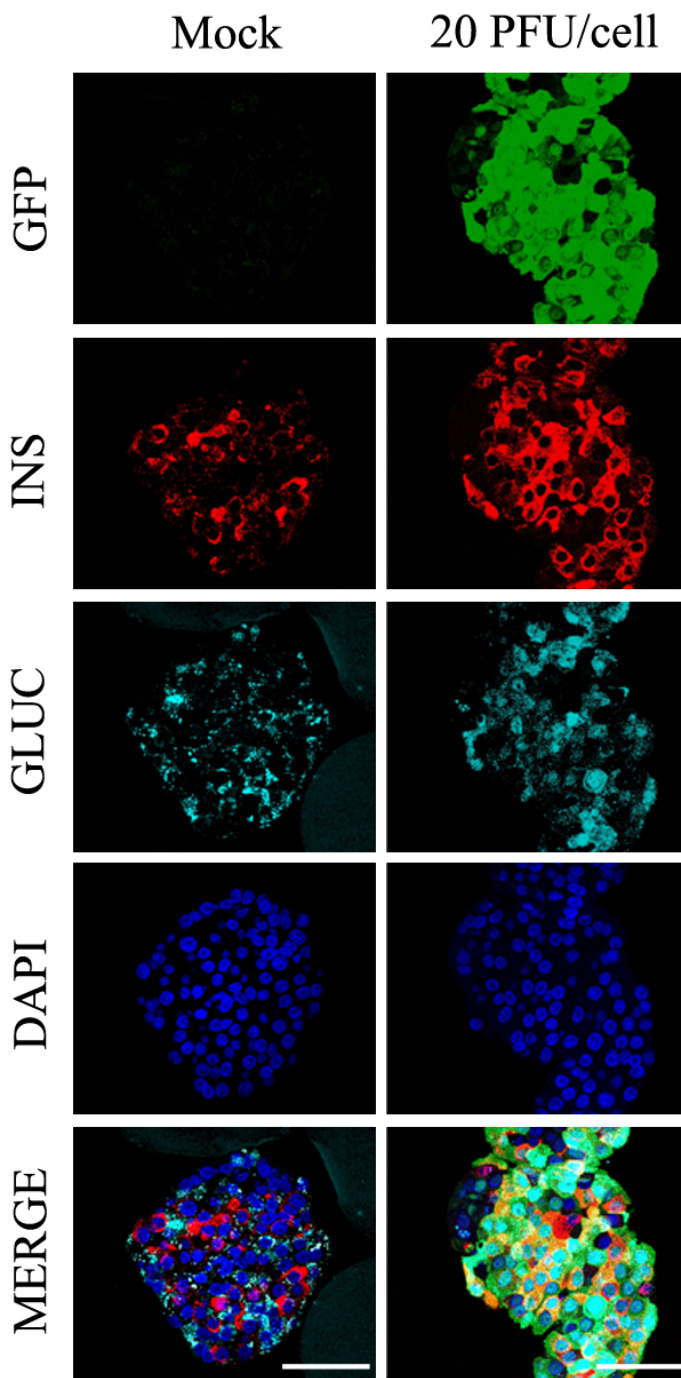

**Supplemental Fig. (1). Homogeneous GFP expression through human islets subsequent to transduction using the optimized protocol.** Co-immunostaining of GFP (green), insulin (red) and glucagon (cyan) was performed on sections from Affi-Gel bead-embedded human pancreatic islets subsequent to treatment. Nuclei were stained with DAPI. Images were captured in samples fixed at 4 days post-infection using confocal microscopy. Scale-bars 50µm. *n*=3 per condition.
